# Supplementary material
Source: PubMed Central journal article supplement (PMC1768652)
Supplement: heart_91_1_118__1.pdf [file heart_91_1_118__1.pdf]

## **Theory and practice of defibrillation: (2) defibrillation for ventricular fibrillation**

**AA Jennifer Adgey, Mark S Spence, Simon J Walsh**

### **Web-only references**

- 1 Janse MJ. A brief history of sudden cardiac death and its therapy. *Pharmacology and Therapeutics* 2003;100:89-99
- 2 Jalife J. Ventricular Fibrillation: Mechanisms of Initiation and Maintenance. *Annu Rev Physiol* 2000;62:25-50
- 3 Adgey AAJ, Walsh SJ. The theory and practice of defibrillation: (1) Atrial fibrillation and DC conversion. *Heart* 2004;90:1493-8.
- 4 Jones JL. Waveforms for implantable cardioverter defibrillators (ICDs) and transchest defibrillation. In: Tacker WA, ed *Defibrillation of the Heart*. St. Louis, Missouri: Mosby-Year Book, Inc, 1994: p46-81
- 5 Kwaku KF, Dillon SM. Shock-induced depolarization of refractory myocardium prevents wave-front propagation in defibrillation. *Circ Res* 1996;79:957-973
- 6 Zipes DP, Fischer J, King RM et al. Termination of ventricular fibrillation in dogs by depolarizing a critical amount of myocardium. *Am J Cardiol* 1975;36:37-44
- 7 Chattipakorn N, Banville I, Gray RA et al. Effects of shock strengths on ventricular defibrillation failure. *Cardiovascular Research* 2004;61:39-44
- 8 Gliner BE, Lyster TE, Dillon SM et al. Transthoracic defibrillation of swine with monophasic and biphasic waveforms. *Circulation* 1995;92:1634-43

- 9 Tang W, Weil MH, Sun S et al. The effects of biphasic and conventional monophasic defibrillation on postresuscitation myocardial function. *J Am Coll Cardiol* 1999;34:815-22
- 10 Leng CT, Paradis NA, Calkins H et al. Resuscitation after prolonged ventricular fibrillation with use of monophasic and biphasic waveform pulses for external defibrillation. *Circulation* 2000;101:2968-2974
- 11 Tang W, Weil MH, Sun S et al. A comparison of biphasic and monophasic waveform defibrillation after prolonged ventricular fibrillation. *Chest* 2001;120:948-954
- 12 Clark CB, Zhang Y, Davies R et al. Transthoracic biphasic waveform defibrillation at very high and very low energies: a comparison with monophasic waveforms in an animal model of ventricular fibrillation. *Resuscitation* 2002;54:183-186
- 13 Walcott GP, Killingsworth CR, Smith WM et al. Biphasic waveform external defibrillation thresholds for spontaneous ventricular fibrillation secondary to acute ischaemia. *J Am Coll Cardiol* 2002;39:359-65
- 14 Dixon EG, Tang ASL, Wolf PD et al. Improved defibrillation thresholds with large contoured epicardial electrodes and biphasic waveforms. *Circulation* 1987;76:1176-1184
- 15 Fain ES, Sweeney MB, Franz MR. Improved internal defibrillation efficacy with a biphasic waveform. *Am Heart J* 1989;117:358-364
- 16 Tang ASL, Yabe S, Wharton JM et al. Ventricular defibrillation using biphasic waveforms: the importance of phasic duration. *J Am Coll Cardiol* 1989;13:207-214
- 17 Feeser SA, Tang ASL, Kavanagh KM et al. Strength-duration and probability of success curves for defibrillation with biphasic waveforms. *Circulation* 1990;82:2128-2141

- 18 Hillsley RE, Walker RG, Swanson DK et al. Is the second phase of a biphasic defibrillation waveform the defibrillating phase? *Pacing Clin Electrophysiol* 1993;16:1401-1411
- 19 Matula MH, Brooks MJ, Pan Q et al. Biphasic waveforms for ventricular defibrillation: Optimization of total pulse and second phase durations. *Pacing Clin Electrophysiol* 1997;20:2154-62
- 20 Kavanagh KM, Tang ASL, Rollins DL et al. Comparison of the internal defibrillation thresholds for monophasic and double and single capacitor biphasic waveforms. *J Am Coll Cardiol* 1989;14:1343-9
- 21 Thakur RK, Souza JJ, Troup PJ et al. A direct comparison of epicardial and nonthoracotomy defibrillation using monophasic and biphasic shocks. *Pacing Clin Electrophysiol* 1995;18:70-74
- 22 Walcott GP, Walker RG, Cates AW et al. Choosing the optimal monophasic and biphasic waveforms for ventricular defibrillation. *J Cardiovasc Electrophysiol* 1995;6:737-750
- 23 Usui M, Walcott GP, Strickberger AS et al. Effects of polarity for monophasic and biphasic shocks on defibrillation efficacy with an endocardial system. *Pacing Clin Electrophysiol* 1996;19:65-71
- 24 Huang J, KenKnight BH, Walcott GP et al. Effects of transvenous electrode polarity and waveform duration on the relationship between defibrillation threshold and upper limit of vulnerability. *Circulation* 1997;96:1351-59
- 25 Neuzner J, Pitschner HF, Huth C et al. Effect of biphasic waveform pulse on endocardial defibrillation efficacy in humans. *Pacing Clin Electrophysiol* 1994;17:207-12

- 26 Natale A, Sra J, Krum D et al. Comparison of biphasic and monophasic pulses: does the advantage of biphasic shocks depend on the waveshape? *Pacing Clin Electrophysiol* 1995;18:1354-61
- 27 Shorofsky SR, Gold MR. Effects of waveform and polarity on defibrillation thresholds in humans using a transvenous lead system. *Am J Cardiol* 1996;78:313-316
- 28 Olsovsky MR, Hodgson DM, Shorofsky SR et al. Effect of biphasic waveforms on transvenous defibrillation thresholds in patients with coronary artery disease. *Am J Cardiol* 1997;80:1098-1100
- 29 Osswald S, Trouton TG, O'Nunain SS et al. Relation between shock-related myocardial injury and defibrillation efficacy of monophasic and biphasic shocks in a canine model. *Circulation* 1994;90:2501-2509
- 30 Dalzell GWN, Cunningham SR, Anderson J et al. Electrode pad size, transthoracic impedance and success of external ventricular defibrillation. *Am J Cardiol* 1989;64:741-4
- 31 Fincke R, Haffajee CI, Barash DM et al. Multicenter Study of Safety and Efficacy of a Biphasic Impedance-Compensating Waveform for Transthoracic Defibrillation. *J Am Coll Cardiol* 2004;43(Suppl):299A
- 32 Walsh SJ, McClelland AJJ, Owens CG et al. Efficacy of Distinct Energy Delivery Protocols Comparing Two Biphasic Defibrillators for Cardiac Arrest. *Am J Cardiol*, In Press 2004
- 33 Huang J, KenKnight BH, Rollins DL et al. Ventricular defibrillation with triphasic waveforms. *Circulation* 2000;101:1324-1328

- 34 Kidwai BJ, McIntyre A, Anderson J et al. Optimization of transthoracic ventricular defibrillation-biphasic and triphasic shocks, waveform rounding and synchronized shock delivery. *J Electrocardiol* 2002;35:235-44
- 35 Zhang Y, Rarnabadran RS, Boddicker KA et al. Triphasic waveforms are superior to biphasic waveforms for transthoracic defibrillation. *J Am Coll Cardiol* 2003;42:568-75
- 36 Diack AW, Welborn WS, Rullman RG et al. An automatic cardiac resuscitator for emergency treatment of cardiac arrest. *Med Instrum* 1979;13:78-83
- 37 Jack CM, Hunter EK, Pringle TH et al. An external automatic device to detect ventricular fibrillation. *Eur Heart J* 1986;7:404-11
- 38 Mosesso VN Jr, Davis EA, Auble TE et al. Use of automated external defibrillators by police officers for treatment of out-of-hospital cardiac arrest. *Ann Emerg Med* 1998;32:200-207
- 39 White RD, Hankins DG, Bugliosi TF. Seven years' experience with early defibrillation by police and paramedics in an emergency medical services system. *Resuscitation* 1998;39:145-151
- 40 Myerberg RJ, Fenster J, Velez M et al. Impact of Community-Wide Police Car Deployment of Automated External Defibrillators on Survival From Out-of-Hospital Cardiac Arrest. *Circulation* 2002;106:1058-1064
- 41 Caffrey SL, Willoughby PJ, Pepe PE et al. Public use of automated external defibrillators. *N Engl J Med* 2002;347:1242-1247
- 42 O'Rourke MF, Donaldson E, Geddes JS. An airline cardiac arrest program. *Circulation* 1997;96:2849-2853

- 43 Page RL, Joglar JA, Kowal RC, et al. Use of automated external defibrillators by a U.S. airline. *N Engl J Med* 2000;343:1210-1216
- 44 Valenzuela TD, Roe DJ, Nichol G et al. Outcomes of rapid defibrillation by security officers after cardiac arrest in casinos. *N Engl J Med* 2000;343:1206-1209
- 45 Capucci A, Aschieri D, Piepoli MF et al. Tripling Survival From Sudden Cardiac Arrest Via Early Defibrillation Without Traditional Education in Cardiopulmonary Resuscitation. *Circulation* 2002; 106: 1065- 1070
- 46 PAD: The Public Access Defibrillation Trial. [www.medscape.com/viewarticle/464582](http://www.medscape.com/viewarticle/464582)
- 47 Stotz M, Albrecht R, Zwicker G et al. EMS defibrillation-first policy may not improve outcome in out-of-hospital cardiac arrest. *Resuscitation* 2003;58:277-282
- 48 Stapczynski JS, Svenson JE, Stone CK. Population density, automated external defibrillator use, and survival in rural cardiac arrest. *Acad Emerg Med* 1997;4:552-558
- 49 Cummins RO, Ornato JP, Thies WH et al. Improving survival from sudden cardiac arrest: the "chain of survival" concept. A statement for health professionals from the Advanced Cardiac Life Support Subcommittee and the Emergency Cardiac Care Committee, American Heart Association. *Circulation* 1991;83:1832-1847
- 50 Saving Lives: Our Healthier Nation. [www.archive.official-documents.co.uk/document/cm43/4386/4386-06.htm](http://www.archive.official-documents.co.uk/document/cm43/4386/4386-06.htm)
- 51 Davies CS, Colquhoun M, Graham S et al. Defibrillators in public places: the introduction of a national scheme for public access defibrillation in England. *Resuscitation* 2002;52:13-21
- 52 Davies CS. Personal communication; In 2004

53 Pell JP, Sirel JM, Marsden AK et al. Potential impact of public access defibrillators on survival after out of hospital cardiopulmonary arrest: retrospective cohort study. *BMJ* 2002;325:515-19

54 Walker A, Sirel JM, Marsden AK et al. Cost effectiveness and cost utility model of public place defibrillators in improving survival after prehospital cardiopulmonary arrest. *BMJ* 2003;327:1316-20

55 Nichol G, Valenzuela T, Roe D et al. Cost effectiveness of defibrillation by targeted responders in public settings. *Circulation* 2003;108:697-703
